# Supplementary material for: The Lawn as a Social and Cultural Phenomenon in Perth, Western Australia
Source: MDPI journal article supplement (doi:10.3390/land13020191), 2024-02-05
Supplement: s1 [file s1]

## Supplementary Material

**Table S1:** List of questions used for the survey

1. We would like to know your general understanding of what lawn is and what it is for. Please write a short response to the following two questions.
2. How would you explain what lawn is? Please write a short definition of lawn in your own words, using the space provided.
3. In your opinion, what is the main purpose of lawns in an urban environment? Write a short explanation in your own words using the space provided.
4. Does your home where you currently live have a lawn for your private use
  - No (1)
  - Yes (2)
5. The next few questions are about the private lawn at the home where you currently live
6. Thinking about your own private lawn, please rate how much you agree or disagree with the following statements (indicate your response using the scale provided: Disagree (1) Neutral (2) Agree (3))
  - The lawn is healthy and well kept
  - The lawn is a good place for rest / relaxation / socialising
  - The lawn looks beautiful
  - The lawn is a good place to rest
7. Thinking about your own private lawn please indicate how frequently the lawn is used for each of the activities listed (use the scale provided: Never (1) Sometimes (2) Often (3))
  - Light exercise (eg walking)
  - Vigorous exercise (eg fitness training)
  - Playing games
  - Passive recreation (eg sitting, socialising)
  - Other (please specify)
8. The next few questions are about the lawn in your nearest public park to where you currently live. The public park near where you live might include anything from a large area of lawn to a smaller pocket park Large urban park Smaller urban park.

9. Thinking about the lawn in your nearest local public park to where you live, please rate how much you agree or disagree with the following statements (please tick the appropriate box) provided: Disagree (1) Neutral (2) Agree (3)

- The lawn is healthy and well kept (1)
- The lawn is a good place for recreation (2)
- The lawn looks beautiful (3)
- The lawn is a good place for rest and relaxation (4)

10. Thinking about the lawn in your nearest local public park to where you live, please indicate how frequently you use the lawn for each of the activities listed (use the scale provided): Never (1) Sometimes (2) Often (3)

- Light exercise (eg walking)
- Vigorous exercise (eg fitness training)
- Organised sport
- Passive recreation (eg sitting relaxation, socialisation)
- Picnics, BBQ, social gatherings
- Playing games
- A transit area (place to pass through)
- Walking pets
- Other

11. How generally satisfied are you with the condition of public and private lawns in the neighbourhood where you live (your overall general impression)?

- Very dissatisfied (1)
- Somewhat dissatisfied (2)
- Neither satisfied nor dissatisfied (3)
- Somewhat satisfied (4)
- Very satisfied (5)

12. Please briefly explain the main reason for your level of satisfaction with the condition of lawns in your neighbourhood where you live.

13. In your opinion, do you think the lawn in urban areas is a good habitat for animals (eg insects, mammals and/or birds)?

- No

- Don't know
- Yes

14. Have you seen any types of animals using the public or private lawns in the neighbourhood where you live?

- No
- Don't know
- Yes (3)

15. Using the text box provided below, please name the types of animals you have seen using lawns in your neighbourhood.

16. Are you allergic to flowering grasses?

- No
- Don't know
- Yes

18. The following images represent types of lawn alternatives that could be used in urban public parks. Thinking about types of possible lawn alternatives that could be used in particular designed spaces in urban public parks where you live. Please indicate your opinion of each lawn type using the scale provided: Good (4) Neutral (5) Bad (6)

- Lawn with turf grasses and clover
- Lawn with turf grasses and Dichondra
- Biodiverse lawn with turf grasses and flowering weeds
- Scaevola patches in dedicated spaces
- 'Old' uncut high grass lawn

19. The following images represent types of possible lawn alternatives that could be used in urban public parks. Focusing on the different lawn alternatives that could be used in dedicated spaces in urban public parks where you live. please drag and drop the images to indicate your order of preference (1 (top) = most preferred, 5 (bottom) = least preferred)

\_\_\_\_\_ Lawn with turf grasses and clover

\_\_\_\_\_ Lawn with turf grasses and Dichondra

\_\_\_\_\_ Biodiverse lawn with turf grasses and flowering weeds

\_\_\_\_\_ Scaveola patches in dedicated spaces

\_\_\_\_\_ 'Old' uncut high grass lawn

20. The next few questions are about managing your own private lawn at your home where you currently live.

Does your home where you currently live have a lawn for your private use = Yes

21. Thinking about your own private lawn at your home where you live, please indicate how often the lawn is mown (select any that apply):

- About once per week (1)
- About once per fortnight (2)
- About once per month (3)
- Never mown (4)
- Other (5)

22. Thinking about your own private lawn at your home where you live, please indicate whether the following lawn heights are currently used when mowing (select any that apply):

- Short mown lawn (less than 3cm tall) (1)
- Long mown lawn (3 cm to 5 cm tall) (2)
- Don't know (3)

23. Thinking about your own private lawn at your home where you live, please indicate whether the following lawn management techniques are currently used (select any that apply):

- Removing mown grass clippings
- Fertilising
- Applying herbicides
- Adding soil wetting agent
- Mowing

24. Does the lawn at the home where you live get regularly watered during hot months (eg with reticulation, a hose or sprinkler)?

- Yes (1)
- No (2)
- Don't know (3)

25. If the lawn at the home where you live is not watered, indicate why by selecting any options that apply from the list provided:

- No reticulation system (1)
- No time to hand water (2)
- Lawn survives without watering (3)
- Watering the lawn is a waste of water (4)
- OK if the lawn dies during dry months (5)
- No sprinkler (7)
- I don't know how to keep my lawn healthy and green during summer (8)
- Other (6)

26. This section asks some very general questions about you to help us better understand the survey responses.

27. How old are you?

- 18-24 years old (1)
- 25-34 years old (2)
- 35-44 years old (3)
- 45-54 years old (4)
- 55-64 years old (5)
- 65+ years old (6)

28. How do you describe yourself?

- Male (1)
- Female (2)
- Non-binary / third gender (3)
- Prefer to self-describe (4)
- Prefer not to say (5)

29. Please indicate the type of dwelling you currently live in:

- Detached house (1)
- Flat / apartment / townhouse (2)
- Other (please specify) (3)

30. Where is your current place of residence?

- Australia (1)
- Country other than Australia (2)

31. If you live in Australia, what state/territory do you live in? (please select from the drop down menu)

- Australian Capital Territory (1)
- New South Wales (2)
- Northern Territory (3)
- Queensland (9)
- South Australia (4)
- Tasmania (5)
- Victoria (6)
- Western Australia (7)
- Other (8)

32. What is your residential postcode? (enter number)

33. What best describes your current employment status?

- Working full-time (1)
- Working part-time/casual (2)
- Home duties (3)
- Unemployed (4)
- Retired (5)
- Student (6)
- Other (7)

34. What best describes your current employment status? = Working part-time/casual

35. Using the drop down menu, select the occupation that most closely matches the one in which you are currently employed?

- Accommodation and Food Services
- Administrative and Support Services
- Agriculture, Forestry and Fishing

- Arts and Recreation Services
- Construction
- Defence Forces
- Education and Training
- Electricity, Gas, Water and Waste Services
- Financial and Insurance Services
- Health Care and Social Assistance
- Information Media and Telecommunications
- Mining, Oil and Gas
- Manufacturing
- Professional, Scientific and Technical Services
- Public Administration and Safety
- Rental, Hiring and Real Estate Services
- Retail Trade
- Transport, Postal and Warehousing
- Wholesale Trade
- Other Services

36. What is your highest level of education?

- Primary school
- Secondary school (high school)
- University graduate
- University higher degree (post graduate)
- Vocational training
- Other

37. Do you have any additional comments about the presence, use or management of lawn in the area where you live?

Enter any comments you have in the box below.

**Table S2:** Use of private lawn for various activities

| Use of lawn for various activities             | Never      | Sometimes     | Often      | N         |
|------------------------------------------------|------------|---------------|------------|-----------|
| Light exercise (e.g. walking)                  | 34 (30.09) | 50<br>(44.25) | 29 (25.66) | 113 (100) |
| Vigorous exercise (e.g. fitness training)      | 61 (53.98) | 44 (38.94)    | 8 (7.08)   | 113 (100) |
| Playing games                                  | 17 (15.18) | 59 (52.68)    | 36 (32.14) | 112 (100) |
| Passive recreation (e.g. sitting, socialising) | 4 (3.57)   | 53 (47.32)    | 55 (49.11) | 112 (100) |
| Others                                         | 11 (21.15) | 9 (17.31)     | 32 (61.54) | 52 (100)  |

Note: Percent in parentheses

**Table S3:** Use of public park for various activities

| Use of public park for various activities      | Never          | Sometimes  | Often         | N            |
|------------------------------------------------|----------------|------------|---------------|--------------|
| Light exercise (e.g. walking)                  | 16 (9.94)      | 61 (37.89) | 84<br>(52.17) | 161<br>(100) |
| Vigorous exercise (eg fitness training)        | 76 (46.91)     | 54 (33.33) | 32<br>(19.76) | 162<br>(100) |
| Organised sport                                | 108<br>(67.08) | 30 (18.63) | 23<br>(14.29) | 161<br>(100) |
| Passive recreation (e.g. sitting, socialising) | 33 (20.25)     | 90 (55.21) | 40<br>(24.54) | 163<br>(100) |
| Picnics, BBQ, social gatherings                | 56 (34.36)     | 77 (47.24) | 30<br>(18.40) | 163<br>(100) |
| Playing games                                  | 59 (36.42)     | 63 (38.89) | 40<br>(24.69) | 162<br>(100) |
| A transit area (place to pass through)         | 26 (16.05)     | 69 (42.59) | 67<br>(41.36) | 162<br>(100) |
| Walking pets                                   | 55 (33.95)     | 28 (17.28) | 79<br>(48.77) | 162<br>(100) |
| Other                                          | 20 (57.14)     | 7 (20.00)  | 8 (22.86)     | 35 (100)     |

Note: Percent in parentheses



**Table S4:** Lawn alternatives that could be used in public parks

| Lawn alternatives                                     | Good          | Neutral    | Bad           | Total obs. |
|-------------------------------------------------------|---------------|------------|---------------|------------|
| Lawn with turf grasses and clover                     | 78<br>(52.00) | 50 (33.33) | 22<br>(14.67) | 150 (100)  |
| Lawn with turf grasses and Dichondra                  | 86<br>(57.33) | 52 (34.67) | 12 (8.00)     | 150 (100)  |
| Biodiverse lawn with turf grasses and flowering weeds | 71<br>(47.34) | 41 (27.33) | 38<br>(25.33) | 150 (100)  |
| Scaevola patches in dedicated spaces                  | 92<br>(60.93) | 28 (18.54) | 31<br>(20.53) | 151 (100)  |
| Old uncut high grass lawn                             | 23<br>(15.34) | 47 (31.33) | 80<br>(53.33) | 150 (100)  |

Note: Percent in parentheses

**Table S5:** Ranking of lawn alternatives

| Lawn alternatives                                     | N   | Mean | Std. Dev. | Min | Max |
|-------------------------------------------------------|-----|------|-----------|-----|-----|
| Lawn with turf grasses and clover                     | 138 | 2.28 | 1.12      | 1   | 5   |
| Lawn with turf grasses and Dichondra                  | 138 | 2.28 | 1.21      | 1   | 5   |
| Biodiverse lawn with turf grasses and flowering weeds | 138 | 3.01 | 1.20      | 1   | 5   |
| Scaevola patches in dedicated spaces                  | 138 | 3.14 | 1.48      | 1   | 5   |
| Old uncut high grass lawn                             | 138 | 4.28 | 1.00      | 1   | 5   |

Note: Small rank value means good alternative as (1 is most preferred to 5 is least preferred)

**Table S6:** Ranking of lawn alternatives

| Lawn alternatives                                     | Most preferred | Preferred  | Neutral       | less preferred | Least preferred | Total obs.   |
|-------------------------------------------------------|----------------|------------|---------------|----------------|-----------------|--------------|
| Lawn with turf grasses and clover                     | 40 (28.99)     | 45 (32.61) | 33<br>(23.91) | 14 (10.14)     | 6 (4.35)        | 138<br>(100) |
| Lawn with turf grasses and Dichondra                  | 48 (34.78)     | 34 (24.64) | 32<br>(23.19) | 17 (12.32)     | 7 (5.07)        | 138<br>(100) |
| Biodiverse lawn with turf grasses and flowering weeds | 17 (12.32)     | 32 (23.19) | 36<br>(26.09) | 38 (27.54)     | 15 (10.86)      | 138<br>(100) |
| Scaevola patches in dedicated spaces                  | 29 (21.01)     | 22 (15.94) | 21<br>(15.21) | 33 (23.91)     | 33 (23.91)      | 138<br>(100) |

|                           |          |          |               |            |            |              |
|---------------------------|----------|----------|---------------|------------|------------|--------------|
| Old uncut high grass lawn | 4 (2.90) | 5 (3.62) | 16<br>(11.59) | 36 (26.09) | 77 (55.80) | 138<br>(100) |
|---------------------------|----------|----------|---------------|------------|------------|--------------|

Note: Percent in parentheses
