# Supplementary material for: The Lawn as a Social and Cultural Phenomenon in Perth, Western Australia
Source: MDPI journal article supplement (doi:10.3390/land13020191), 2024-02-05
Supplement: s1 [file s1]

Archive with 1 entries (1 files):
- land-2813308-supplementary.pdf
